# Supplementary material for: Oriented α-Fe2O3 and Fe3O4 nanoporous films obtained by topotactic-like pseudomorphic transformation of γ- and δ-FeOOH films
Source: Royal Society of Chemistry journal article supplement (doi:10.1039/d4tc00617h), 2024-01-01
Supplement: d4tc00617h1.pdf [file d4tc00617h1.pdf]

## Supplementary Information

# **Oriented $\alpha$ -Fe<sub>2</sub>O<sub>3</sub> and Fe<sub>3</sub>O<sub>4</sub> Nanoporous Films Obtained by Topotactic-like Pseudomorphic Transformation of $\gamma$ - and $\delta$ -FeOOH Films**

*Tsutomu Shinagawa,<sup>\*a</sup> Yuya Kanemoto<sup>b</sup> and Atsushi Ohtaka<sup>b</sup>*

<sup>a</sup> Research division of Electronic Materials, Morinomiya center, Osaka Research Institute of Industrial Science and Technology (ORIST), 1-6-50 Morinomiya, Joto, Osaka, 536-8553, Japan.

<sup>b</sup> Department of Applied Chemistry, Faculty of Engineering, Osaka Institute of Technology, 5-16-1 Ohmiya, Asahi, Osaka, 535-8585, Japan.

\*Corresponding author: E-mail: tshina@orist.jp.

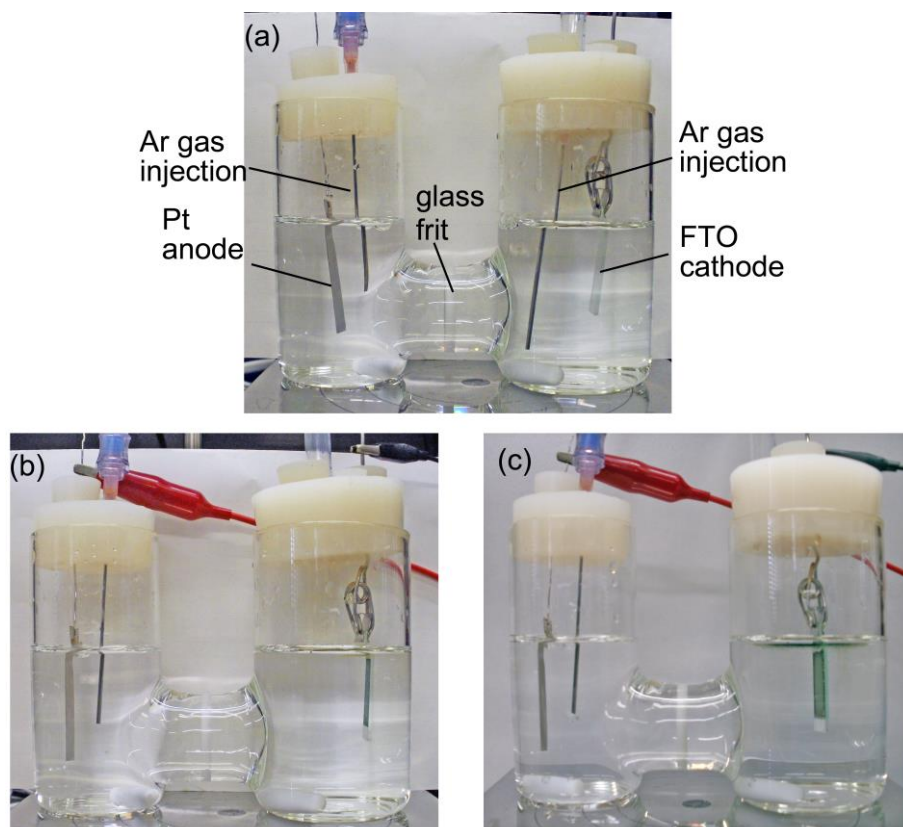

**Figure S1.** Photographs of the electrodeposition setup for growing GR films on FTO substrates using an H-type cell: (a) before electrodeposition, during electrodeposition at current densities of (b) 0.25 and (c) 4.0 mA cm<sup>-2</sup>.

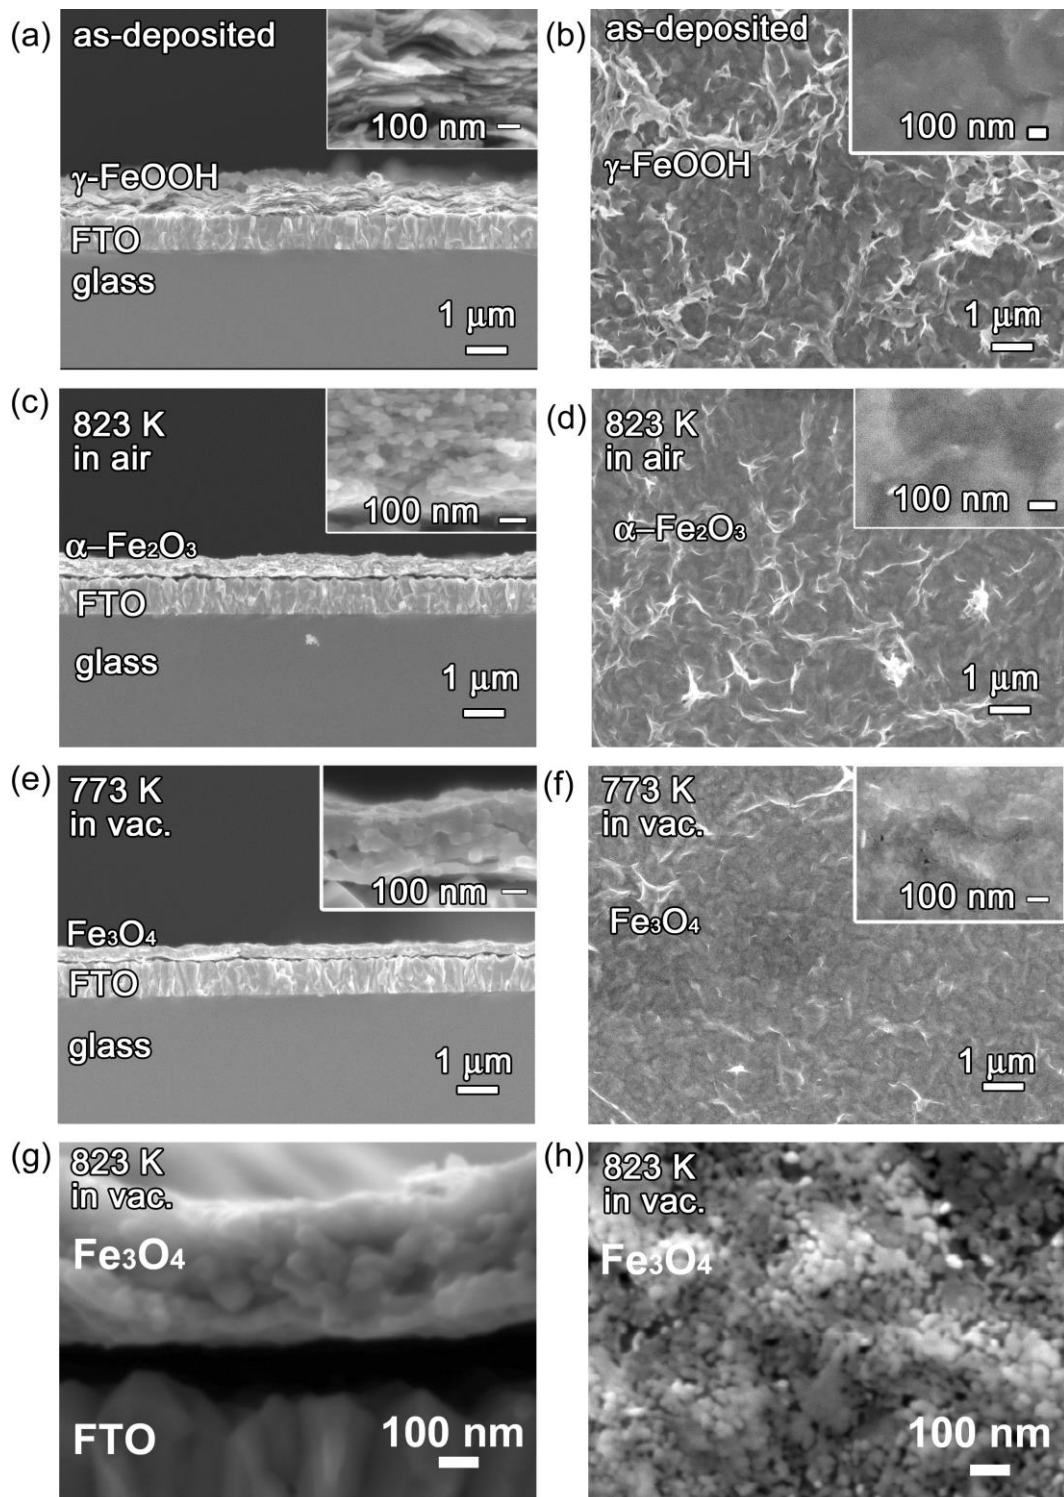

**Figure S2.** (a, c, e, g) Cross-sectional and (b, d, f, h) top-view FESEM images: (a, b) as-deposited [010]- $\gamma$ -FeOOH films electrodeposited at  $0.25 \text{ mA cm}^{-2}$ , (c, d) (104)- and (116)- $\alpha$ - $\text{Fe}_2\text{O}_3$  films obtained by heating the  $\gamma$ -FeOOH films at 823 K in air and [110]- $\text{Fe}_3\text{O}_4$  films obtained by heating the  $\gamma$ -FeOOH films at (e, f) 773 and (g, h) 823 K in vacuum. Insets show magnified views.

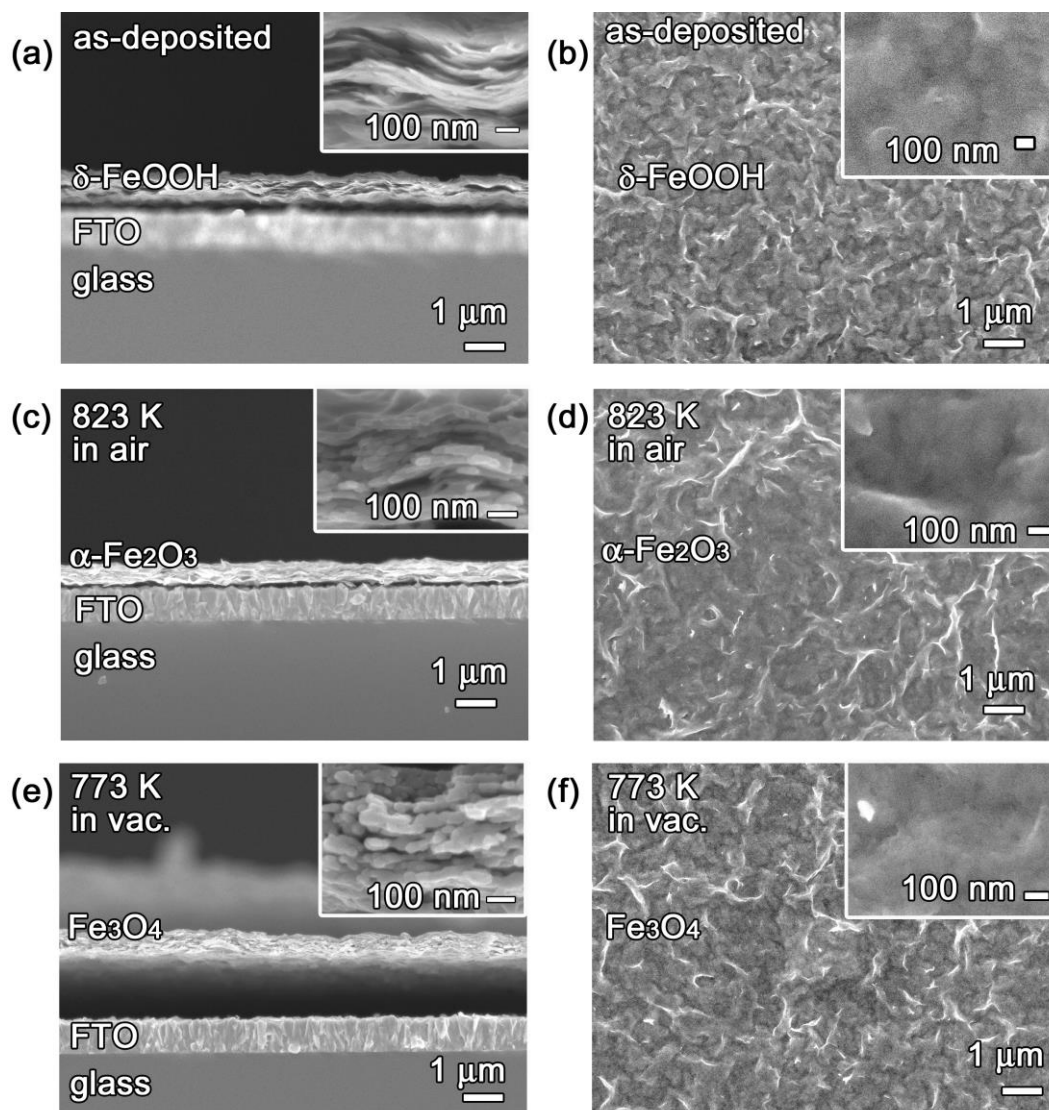

**Figure S3.** (a, c, e) Cross-sectional and (b, d, f) top-view FESEM images: (a, b) as-deposited [001]- $\delta$ -FeOOH films electrodeposited at  $4.0 \text{ mA cm}^{-2}$ , (c, d) [001]- $\alpha$ -Fe<sub>2</sub>O<sub>3</sub> films obtained by heating the  $\delta$ -FeOOH films at 823 K in air and (e, f) [111]-Fe<sub>3</sub>O<sub>4</sub> films obtained by heating the  $\delta$ -FeOOH films at 773 K in vacuum. Insets show magnified views.

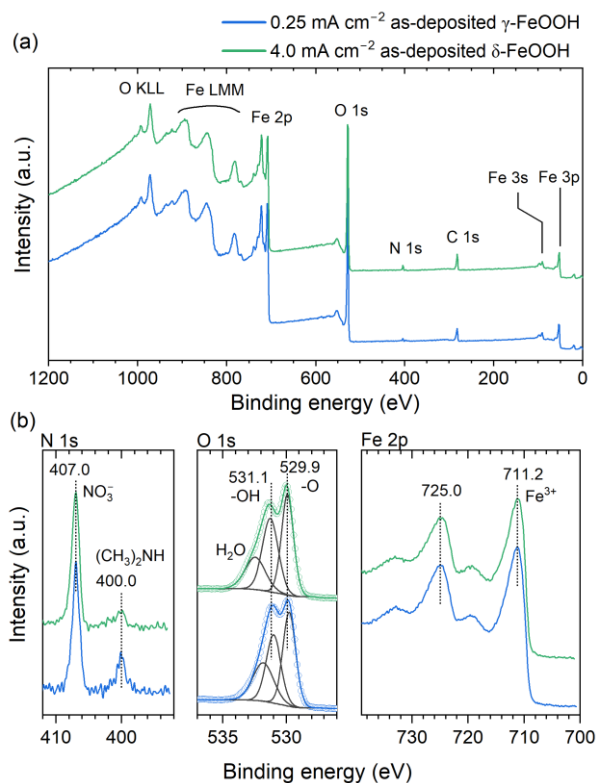

**Figure S4.** (a) wide-scan and (b) fine-scan XPS spectra of the as-deposited [010]- $\gamma$ -FeOOH and [001]- $\delta$ -FeOOH films electrodeposited on FTO substrates at 0.25 and 4.0 mA cm<sup>-2</sup>, respectively.

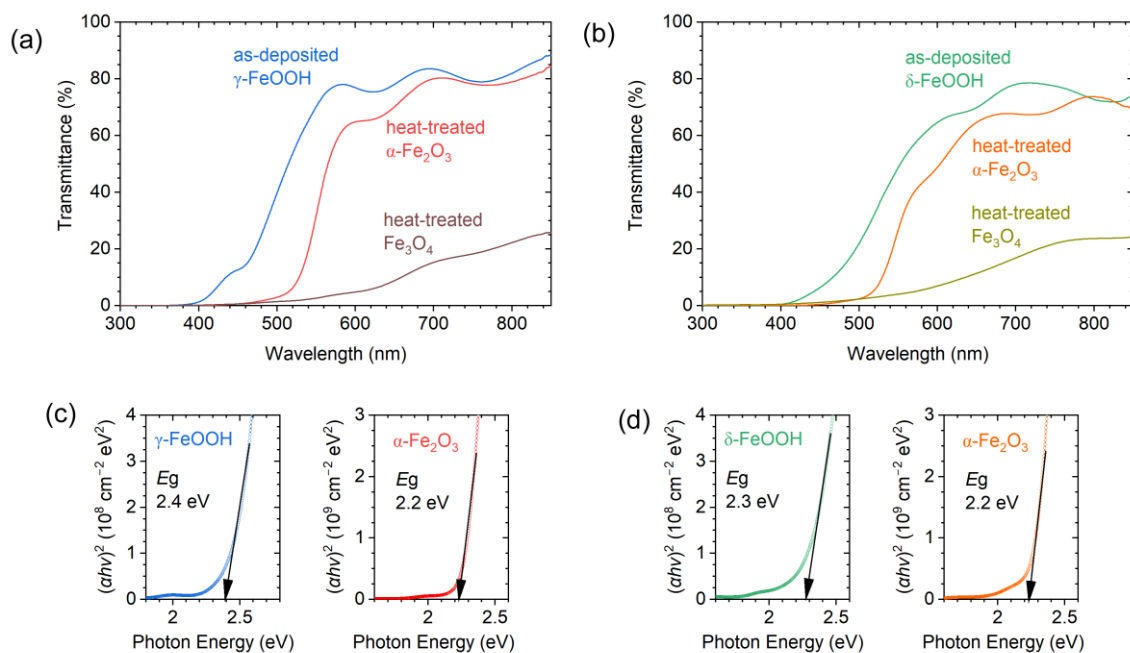

**Figure S5.** UV-vis transmittance spectra of a series of films electrodeposited at (a) 0.25 and (b) 4.0 mA cm<sup>-2</sup>: the as-deposited  $\gamma$ - and  $\delta$ -FeOOH, heat-treated  $\alpha$ -Fe<sub>2</sub>O<sub>3</sub> and Fe<sub>3</sub>O<sub>4</sub> films. (c, d) Tauc plots for the FeOOH and  $\alpha$ -Fe<sub>2</sub>O<sub>3</sub> films.

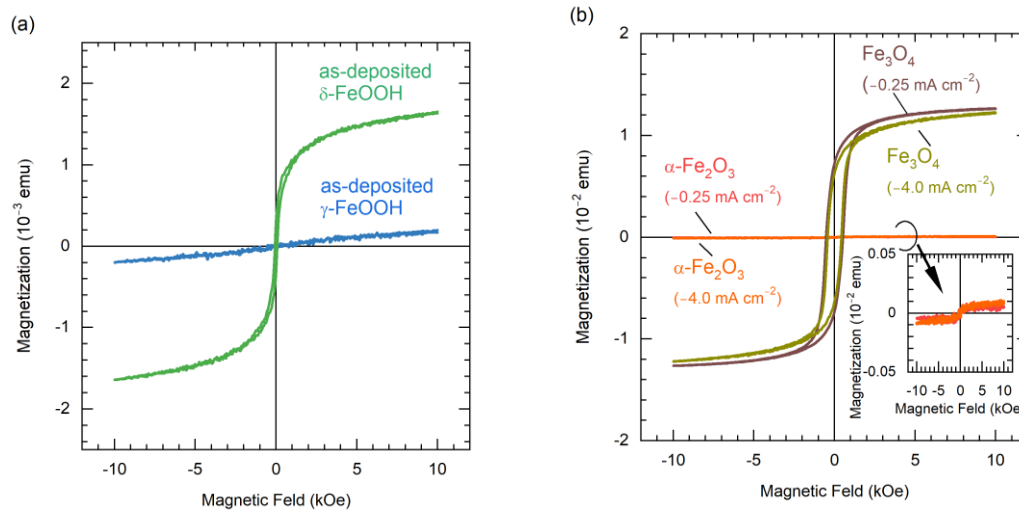

**Figure S6.** Magnetization curves measured at room temperature for the (a) as-deposited  $\gamma$ - and  $\delta$ -FeOOH films electrodeposited at 0.25 and 4.0 mA cm<sup>-2</sup>, (b) the heat-treated  $\alpha$ -Fe<sub>2</sub>O<sub>3</sub> and Fe<sub>3</sub>O<sub>4</sub> films. The inset shows a magnified curves for the  $\alpha$ -Fe<sub>2</sub>O<sub>3</sub> films.
